# Supplementary material
Source: Springer Nature journal article supplement (http://www.springermedizin.de/resource/supplementary/13195_2014_222_MOESM6_ESM.pdf/9688532)

**A: Dopamine transporter imaging ( $^{123}\text{I}$ -FP-CIT SPECT)**

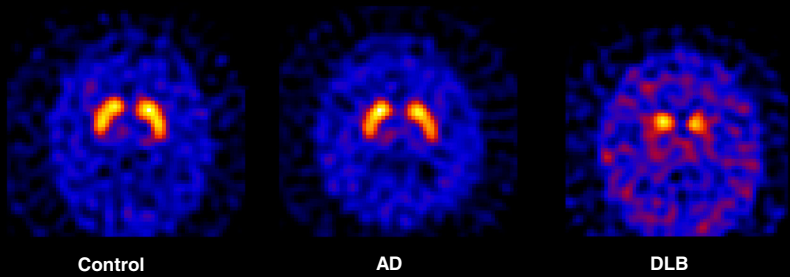

**B: Blood flow imaging ( $^{99\text{m}}\text{Tc}$ -HMPAO SPECT)**

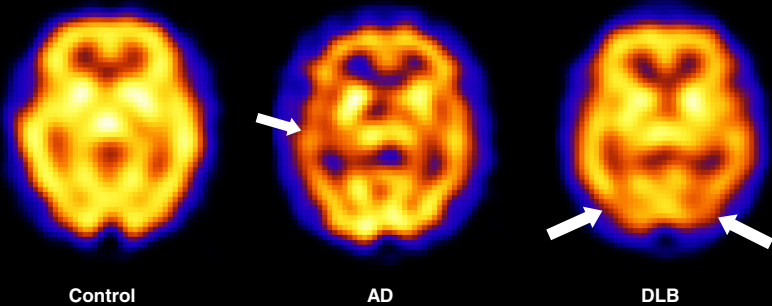

Supplement: MOESM6 [file 9688532]
